# Supplementary material
Source: PubMed Central journal article supplement (PMC9724847)
Supplement: EIJ-D-22-00311_Gmeiner_SD.pdf [file EIJ-D-22-00311_Gmeiner_SD.pdf]

## Supplementary data

**Supplementary Table 1. Antithrombotic therapy.**

| Antithrombotic therapy                             | Dual ProGlide<br>(n=437) | ProGlide + FemoSeal<br>(n=437) | p-value      |
|----------------------------------------------------|--------------------------|--------------------------------|--------------|
| <b>Baseline</b>                                    |                          |                                |              |
| Antiplatelet monotherapy                           | 228 (52.2%)              | 205 (46.9%)                    | 0.12         |
| Dual antiplatelet therapy                          | 56 (12.8%)               | 40 (9.2%)                      | 0.08         |
| Oral anticoagulation                               | 187 (42.8%)              | 176 (40.3%)                    | 0.43         |
| Vitamin K antagonists                              | 48 (11.0%)               | 32 (7.3%)                      | 0.06         |
| DOAC                                               | 139 (32.0%)              | 144 (33.0%)                    | 0.94         |
| Oral anticoagulation + single antiplatelet therapy | 58 (13.3%)               | 35 (8.0%)                      | <b>0.011</b> |
| Triple therapy*                                    | 13 (3.0%)                | 11 (2.5%)                      | 0.68         |
| <b>Discharge</b>                                   |                          |                                |              |
| Antiplatelet monotherapy                           | 102 (23.3%)              | 125 (28.6%)                    | 0.12         |
| Dual antiplatelet therapy                          | 232 (53.1%)              | 230 (52.6%)                    | 0.90         |
| Oral anticoagulation                               | 208 (47.6%)              | 207 (47.4%)                    | 0.74         |
| Vitamin K antagonists                              | 44 (10.1%)               | 25 (5.7%)                      | <b>0.014</b> |
| DOAC                                               | 164 (37.5%)              | 182 (41.6%)                    | 0.30         |
| Oral anticoagulation + single antiplatelet         | 76 (17.4%)               | 66 (15.1%)                     | 0.29         |
| Triple therapy                                     | 33 (7.6%)                | 26 (5.9%)                      | 0.30         |

Values are depicted as no. (percentage of total no.)

\*Triple therapy: dual antiplatelet therapy and oral anticoagulation

DOAC: direct oral anticoagulant

**Supplementary Table 2. Details of vascular complications.**

| <b>Variable</b>                      | <b>Dual ProGlide<br/>(n=437)</b> | <b>ProGlide + FemoSeal<br/>(n=437)</b> | <b>p-value</b>   |
|--------------------------------------|----------------------------------|----------------------------------------|------------------|
| Closure device failure               | 12 (2.7%)                        | 4 (0.9%)                               | <b>0.044</b>     |
| Hematoma/bleeding                    | 48 (11.0%)                       | 15 (3.4%)                              | <b>&lt;0.001</b> |
| Pseudoaneurysm                       | 14 (3.2%)                        | 15 (3.4%)                              | 0.85             |
| Thrombin injection of pseudoaneurysm | 6 (1.4%)                         | 10 (2.3%)                              | 0.31             |
| AV-fistula                           | 3 (0.7%)                         | 3 (0.7%)                               | 1                |
| Limb ischaemia                       | 3 (0.7%)                         | 0                                      | 0.25             |
| Dissection                           | 1 (0.2%)                         | 1 (0.2%)                               | 1                |
| Unplanned surgery                    | 14 (3.2%)                        | 3 (0.7%)                               | <b>0.007</b>     |
| Unplanned endovascular treatment     | 4 (0.9%)                         | 1 (0.2%)                               | 0.37             |
| Bailout MANTA VCD                    | 1 (0.2%)                         | 3 (0.7%)                               | 0.62             |
| Intestinal ischaemia                 | 1 (0.2%)                         | 0                                      | 1                |

Values are depicted as no. (percentage of total no.).

AV-fistula: arteriovenous fistula; VCD: vascular closure device

**Supplementary Table 3. Predictors of the primary endpoint.**

|                         | Univariable analysis |                  | Multivariable analysis |                  |
|-------------------------|----------------------|------------------|------------------------|------------------|
|                         | OR (95% CI)          | p-value          | OR (95% CI)            | p-value          |
| Age                     | 1.04 (1.00-1.07)     | <b>0.041</b>     | 1.04 (1.00-1.08)       | <b>0.049</b>     |
| GFR                     | 0.99 (0.98-1.00)     | 0.11             |                        |                  |
| Baseline haemoglobin    | 0.88 (0.7-0.98)      | <b>0.026</b>     | 0.89 (0.79-1.01)       | 0.06             |
| Body mass index         | 0.98 (0.94-1.03)     | 0.39             |                        |                  |
| COPD                    | 1.43 (0.78-2.64)     | 0.25             |                        |                  |
| PAD                     | 0.81 (0.40-1.67)     | 0.57             |                        |                  |
| Oral anticoagulation    | 1.34 (0.88-2.04)     | 0.18             |                        |                  |
| Female sex              | 1.28 (0.84-1.94)     | 0.25             |                        |                  |
| ProGlide+FemoSeal       | 0.25 (0.15-0.41)     | <b>&lt;0.001</b> | 0.24 (0.14-0.39)       | <b>&lt;0.001</b> |
| Coronary artery disease | 2.18 (1.36-3.51)     | <b>0.001</b>     | 2.28 (1.40-3.71)       | <b>0.001</b>     |
| LVEF                    | 0.99 (0.97-1.01)     | 0.23             |                        |                  |
| Diabetes mellitus       | 1.16 (0.73-1.84)     | 0.54             |                        |                  |
| Tertile 1               | 1.25 (0.76-2.05)     | 0.38             |                        |                  |
| Tertile 2*              | Reference            |                  |                        |                  |
| Tertile 3               | 0.86 (0.50-1.47)     | 0.57             |                        |                  |

\*Both study groups were divided into tertiles based on the time of intervention and tertile 2 was selected as reference for logistic regression analysis.

COPD: chronic pulmonary obstructive disease; GFR: glomerular filtration rate; LVEF: left ventricular ejection fraction; OR: odds ratio; PAD: peripheral artery disease

**Supplementary Figure 1.** Standardised mean differences before and after propensity score matching.

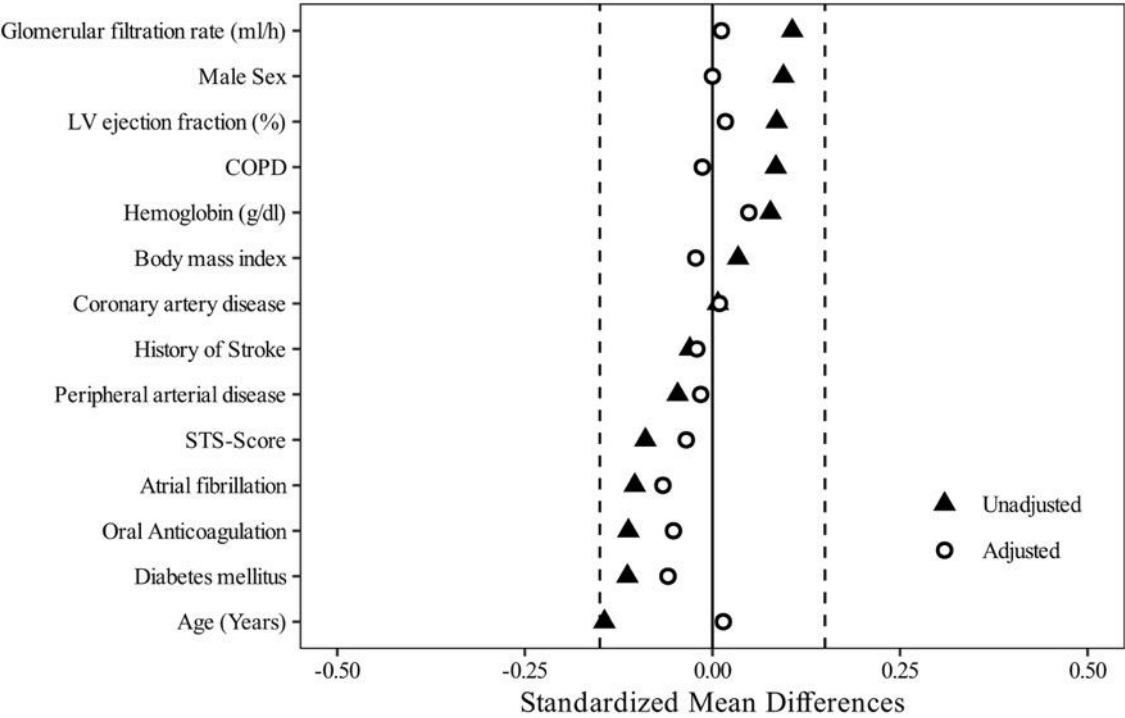

Love plot of standardised mean differences before and after propensity score matching. COPD: chronic obstructive pulmonary disease; LV: left ventricular; STS: Society of Thoracic Surgeons
